# Supplementary material
Source: publisher site journal article supplement (https://www.dovepress.com/article/415640)
Supplement: Supplementary file 1 [file get_supplementary_file.php]

| **Table S1 Basic information on genetic instruments.** | | | | | | | | | | | |
| --- | --- | --- | --- | --- | --- | --- | --- | --- | --- | --- | --- |
| SNP | Exposure | Sample size | Effect_allele | Other_allele | chr. | eaf. | β | SE | Pos | P | F |
| rs354155 | Depression | 500199 | C | G | 1 | 0.0923 | -0.0449 | 0.0075 | 49675276 | 1.75E-09 | 35.84018 |
| rs111750830 | Depression | 500199 | A | G | 1 | 0.084 | 0.0358 | 0.0078 | 1.08E+08 | 4.99E-06 | 21.06575 |
| rs4653218 | Depression | 500199 | C | T | 1 | 0.5805 | -0.023 | 0.0044 | 37197319 | 1.27E-07 | 27.32438 |
| rs4141983 | Depression | 500199 | C | T | 1 | 0.326 | -0.0264 | 0.0046 | 18122009 | 9.69E-09 | 32.93762 |
| rs10747480 | Depression | 500199 | A | G | 1 | 0.5246 | 0.0207 | 0.0044 | 96956089 | 2.81E-06 | 22.13275 |
| rs72737052 | Depression | 500199 | G | A | 1 | 0.0671 | 0.047 | 0.0087 | 1.91E+08 | 5.82E-08 | 29.18483 |
| rs2246221 | Depression | 500199 | A | G | 1 | 0.5018 | 0.0219 | 0.0043 | 2.27E+08 | 3.56E-07 | 25.93889 |
| rs75520450 | Depression | 500199 | C | T | 1 | 0.0389 | -0.0532 | 0.0115 | 1.74E+08 | 3.55E-06 | 21.40068 |
| rs10913112 | Depression | 500199 | T | C | 1 | 0.378 | -0.0262 | 0.0045 | 1.76E+08 | 4.53E-09 | 33.89827 |
| rs2861885 | Depression | 500199 | A | C | 1 | 0.1161 | 0.035 | 0.0067 | 1.77E+08 | 1.75E-07 | 27.28893 |
| rs7515828 | Depression | 500199 | C | T | 1 | 0.614 | -0.0231 | 0.0044 | 73848331 | 1.61E-07 | 27.5625 |
| rs4971040 | Depression | 500199 | C | A | 1 | 0.8396 | 0.0286 | 0.0059 | 1.51E+08 | 1.06E-06 | 23.49785 |
| rs12125521 | Depression | 500199 | C | T | 1 | 0.2883 | -0.0221 | 0.0048 | 2.14E+08 | 3.57E-06 | 21.19835 |
| rs17641524 | Depression | 500199 | T | C | 1 | 0.2101 | -0.03 | 0.0053 | 1.98E+08 | 1.50E-08 | 32.03987 |
| rs7538938 | Depression | 500199 | C | T | 1 | 0.5599 | 0.0251 | 0.0043 | 67132262 | 7.29E-09 | 34.07301 |
| rs2568958 | Depression | 500199 | A | G | 1 | 0.6042 | 0.0382 | 0.0044 | 72765116 | 2.90E-18 | 75.37397 |
| rs2784738 | Depression | 500199 | A | G | 1 | 0.2482 | 0.0247 | 0.005 | 8466217 | 6.83E-07 | 24.4036 |
| rs905111 | Depression | 500199 | G | A | 1 | 0.7134 | -0.0219 | 0.0048 | 37715267 | 4.31E-06 | 20.81641 |
| rs7551758 | Depression | 500199 | G | T | 1 | 0.5329 | 0.0283 | 0.0043 | 52274078 | 5.11E-11 | 43.31476 |
| rs72948506 | Depression | 500199 | A | G | 2 | 0.2975 | 0.0265 | 0.0047 | 2.13E+08 | 1.71E-08 | 31.7904 |
| rs12615271 | Depression | 500199 | A | G | 2 | 0.2818 | -0.0223 | 0.0048 | 1.41E+08 | 2.85E-06 | 21.58377 |
| rs7595982 | Depression | 500199 | G | T | 2 | 0.4099 | 0.0245 | 0.0046 | 1.61E+08 | 7.74E-08 | 28.3672 |
| rs76227152 | Depression | 500199 | C | A | 2 | 0.0449 | -0.0518 | 0.0104 | 58201924 | 6.73E-07 | 24.80806 |
| rs2582954 | Depression | 500199 | T | C | 2 | 0.4005 | -0.0222 | 0.0044 | 1.04E+08 | 5.65E-07 | 25.45661 |
| rs7584419 | Depression | 500199 | A | C | 2 | 0.3451 | 0.0211 | 0.0045 | 1.05E+08 | 3.01E-06 | 21.98568 |
| rs2111592 | Depression | 500199 | A | G | 2 | 0.3141 | 0.0263 | 0.0046 | 2.08E+08 | 1.35E-08 | 32.68856 |
| rs52849 | Depression | 500199 | G | A | 2 | 0.0405 | -0.0508 | 0.011 | 1.6E+08 | 4.02E-06 | 21.3276 |
| rs150586937 | Depression | 500199 | A | C | 2 | 0.0104 | -0.1074 | 0.0224 | 1.81E+08 | 1.64E-06 | 22.9886 |
| rs12619197 | Depression | 500199 | A | G | 2 | 0.4515 | 0.0233 | 0.0043 | 22566548 | 6.83E-08 | 29.36128 |
| rs780025 | Depression | 500199 | T | G | 2 | 0.3428 | 0.0239 | 0.0046 | 1.25E+08 | 1.95E-07 | 26.9948 |
| rs56211578 | Depression | 500199 | C | A | 2 | 0.1533 | 0.0275 | 0.006 | 86796962 | 4.74E-06 | 21.00694 |
| rs6746122 | Depression | 500199 | A | G | 2 | 0.3405 | 0.0226 | 0.0046 | 1.45E+08 | 8.70E-07 | 24.138 |
| rs699927 | Depression | 500199 | G | T | 3 | 0.4171 | 0.024 | 0.0044 | 1.58E+08 | 3.79E-08 | 29.75207 |
| rs9831648 | Depression | 500199 | T | G | 3 | 0.7739 | -0.0292 | 0.0052 | 49214303 | 1.59E-08 | 31.53254 |
| rs34341246 | Depression | 500199 | C | T | 3 | 0.5015 | 0.0203 | 0.0043 | 29764189 | 2.25E-06 | 22.28718 |
| rs9825208 | Depression | 500199 | T | G | 3 | 0.4454 | -0.0204 | 0.0043 | 1.01E+08 | 2.41E-06 | 22.5073 |
| rs66511648 | Depression | 500199 | C | T | 3 | 0.284 | 0.0297 | 0.0048 | 1.18E+08 | 6.03E-10 | 38.28516 |
| rs6765468 | Depression | 500199 | A | G | 3 | 0.321 | 0.0235 | 0.0046 | 44609626 | 3.11E-07 | 26.09877 |
| rs76954012 | Depression | 500199 | A | T | 3 | 0.0931 | 0.0412 | 0.0074 | 1.16E+08 | 2.41E-08 | 30.99781 |
| rs843812 | Depression | 500199 | A | G | 3 | 0.4117 | 0.0248 | 0.0044 | 61255413 | 1.41E-08 | 31.7686 |
| rs12487069 | Depression | 500199 | A | G | 3 | 0.5623 | -0.0202 | 0.0043 | 1.85E+08 | 3.48E-06 | 22.06814 |
| rs112844822 | Depression | 500199 | T | C | 3 | 0.0315 | 0.0651 | 0.0128 | 38415478 | 3.72E-07 | 25.86676 |
| rs12512642 | Depression | 500199 | T | C | 4 | 0.2293 | 0.0263 | 0.0052 | 1.31E+08 | 3.48E-07 | 25.58025 |
| rs28649197 | Depression | 500199 | G | T | 4 | 0.0245 | -0.0737 | 0.0146 | 95150054 | 4.23E-07 | 25.48175 |
| rs6553965 | Depression | 500199 | G | A | 4 | 0.3324 | 0.0222 | 0.0046 | 1.77E+08 | 1.13E-06 | 23.29112 |
| rs3905238 | Depression | 500199 | G | A | 4 | 0.412 | -0.0236 | 0.0045 | 3078937 | 1.98E-07 | 27.5042 |
| rs10755215 | Depression | 500199 | T | C | 4 | 0.4324 | 0.0225 | 0.0043 | 15533037 | 2.19E-07 | 27.37966 |
| rs6832890 | Depression | 500199 | C | G | 4 | 0.1979 | -0.0251 | 0.0054 | 42106538 | 4.08E-06 | 21.60528 |
| rs353308 | Depression | 500199 | A | T | 4 | 0.0819 | 0.0381 | 0.008 | 60440097 | 1.94E-06 | 22.68141 |
| rs55993110 | Depression | 500199 | C | G | 4 | 0.1728 | -0.0283 | 0.0059 | 1.84E+08 | 1.48E-06 | 23.00747 |
| rs6846784 | Depression | 500199 | C | T | 4 | 0.381 | 0.0209 | 0.0044 | 1.6E+08 | 2.32E-06 | 22.5625 |
| rs2132342 | Depression | 500199 | A | G | 4 | 0.4021 | -0.0223 | 0.0044 | 59873841 | 3.56E-07 | 25.68647 |
| rs1116690 | Depression | 500199 | G | A | 4 | 0.7485 | 0.025 | 0.005 | 1.44E+08 | 4.46E-07 | 25 |
| rs34751496 | Depression | 500199 | A | G | 4 | 0.4313 | -0.0203 | 0.0044 | 65446777 | 3.34E-06 | 21.28564 |
| rs7725715 | Depression | 500199 | A | G | 5 | 0.5343 | 0.029 | 0.0043 | 1.64E+08 | 1.61E-11 | 45.48405 |
| rs1512547 | Depression | 500199 | A | G | 5 | 0.3125 | -0.0231 | 0.0047 | 19403442 | 7.45E-07 | 24.15618 |
| rs60157091 | Depression | 500199 | T | C | 5 | 0.5126 | 0.0215 | 0.0043 | 61509655 | 6.41E-07 | 25 |
| rs185214 | Depression | 500199 | A | G | 5 | 0.2379 | -0.0243 | 0.0051 | 77392046 | 1.73E-06 | 22.70242 |
| rs30266 | Depression | 500199 | A | G | 5 | 0.3271 | 0.0366 | 0.0046 | 1.04E+08 | 1.43E-15 | 63.30624 |
| rs247910 | Depression | 500199 | G | A | 5 | 0.457 | 0.0237 | 0.0043 | 87630769 | 4.71E-08 | 30.37804 |
| rs10061069 | Depression | 500199 | C | G | 5 | 0.2222 | -0.028 | 0.0052 | 93071630 | 6.52E-08 | 28.99408 |
| rs67767662 | Depression | 500199 | G | T | 5 | 0.201 | 0.0248 | 0.0054 | 1.67E+08 | 3.56E-06 | 21.09191 |
| rs12188637 | Depression | 500199 | G | A | 5 | 0.2801 | -0.0219 | 0.0048 | 91779010 | 4.87E-06 | 20.81641 |
| rs138039555 | Depression | 500199 | T | C | 5 | 0.074 | -0.0385 | 0.0084 | 1.46E+08 | 4.06E-06 | 21.00694 |
| rs1466386 | Depression | 500199 | G | A | 5 | 0.1704 | -0.0262 | 0.0057 | 1.53E+08 | 4.97E-06 | 21.12773 |
| rs6449561 | Depression | 500199 | C | G | 5 | 0.2238 | 0.0242 | 0.0052 | 61123594 | 3.21E-06 | 21.65828 |
| rs34416809 | Depression | 500199 | C | T | 5 | 0.0674 | -0.0444 | 0.0088 | 92430000 | 4.02E-07 | 25.45661 |
| rs11755188 | Depression | 500199 | T | C | 6 | 0.0609 | 0.0429 | 0.0093 | 4996129 | 3.75E-06 | 21.27888 |
| rs12661596 | Depression | 500199 | G | A | 6 | 0.2354 | -0.0254 | 0.0051 | 17016400 | 5.04E-07 | 24.80431 |
| rs2214123 | Depression | 500199 | G | A | 6 | 0.6466 | -0.0261 | 0.0045 | 67000001 | 8.56E-09 | 33.64 |
| rs72830861 | Depression | 500199 | T | C | 6 | 0.0339 | 0.0568 | 0.012 | 24281114 | 2.00E-06 | 22.40444 |
| rs2232423 | Depression | 500199 | G | A | 6 | 0.1056 | -0.062 | 0.007 | 28366151 | 1.14E-18 | 78.44898 |
| rs9364755 | Depression | 500199 | G | A | 6 | 0.2262 | 0.0283 | 0.0051 | 1.65E+08 | 3.49E-08 | 30.79162 |
| rs4707630 | Depression | 500199 | T | C | 6 | 0.2592 | 0.0225 | 0.0049 | 91321667 | 4.14E-06 | 21.08496 |
| rs2876520 | Depression | 500199 | G | C | 6 | 0.4688 | 0.026 | 0.0043 | 1.43E+08 | 2.24E-09 | 36.5603 |
| rs4895718 | Depression | 500199 | T | C | 6 | 0.6656 | -0.0224 | 0.0045 | 1.48E+08 | 8.78E-07 | 24.77827 |
| rs12526217 | Depression | 500199 | C | T | 6 | 0.1226 | -0.0344 | 0.0066 | 1.31E+08 | 1.60E-07 | 27.16621 |
| rs7758630 | Depression | 500199 | A | T | 6 | 0.4046 | -0.0229 | 0.0044 | 1.01E+08 | 1.82E-07 | 27.08729 |
| rs150186873 | Depression | 500199 | C | A | 6 | 0.0327 | 0.0704 | 0.012 | 27182377 | 4.51E-09 | 34.41778 |
| rs59082935 | Depression | 500199 | T | C | 7 | 0.1342 | 0.0363 | 0.0066 | 38724868 | 3.07E-08 | 30.25 |
| rs112610187 | Depression | 500199 | T | G | 7 | 0.05 | -0.0477 | 0.0103 | 4146122 | 3.83E-06 | 21.44679 |
| rs2888566 | Depression | 500199 | C | T | 7 | 0.1511 | 0.0285 | 0.006 | 1.49E+08 | 2.34E-06 | 22.5625 |
| rs3807865 | Depression | 500199 | A | G | 7 | 0.4105 | 0.031 | 0.0044 | 12250402 | 1.09E-12 | 49.63843 |
| rs751996 | Depression | 500199 | C | G | 7 | 0.4611 | -0.0204 | 0.0044 | 1.59E+08 | 2.72E-06 | 21.49587 |
| rs55908506 | Depression | 500199 | C | A | 7 | 0.0801 | -0.0397 | 0.008 | 70164703 | 7.11E-07 | 24.62641 |
| rs80243771 | Depression | 500199 | G | A | 7 | 0.0841 | 0.0373 | 0.008 | 73751060 | 2.96E-06 | 21.73891 |
| rs4730387 | Depression | 500199 | A | T | 7 | 0.4659 | 0.0238 | 0.0043 | 1.09E+08 | 4.12E-08 | 30.63494 |
| rs150346963 | Depression | 500199 | T | C | 7 | 0.4118 | 0.0283 | 0.0044 | 1.18E+08 | 1.16E-10 | 41.36829 |
| rs10235664 | Depression | 500199 | C | T | 7 | 0.2529 | -0.027 | 0.0049 | 2086814 | 4.68E-08 | 30.36235 |
| rs2237738 | Depression | 500199 | G | A | 7 | 0.3776 | -0.0206 | 0.0044 | 1.26E+08 | 3.39E-06 | 21.91942 |
| rs2522831 | Depression | 500199 | C | T | 7 | 0.4739 | 0.024 | 0.0043 | 82448100 | 2.11E-08 | 31.15197 |
| rs12542837 | Depression | 500199 | C | T | 8 | 0.3882 | 0.0207 | 0.0044 | 1.3E+08 | 2.71E-06 | 22.13275 |
| rs9642819 | Depression | 500199 | A | G | 8 | 0.2584 | 0.0241 | 0.0049 | 1.14E+08 | 9.12E-07 | 24.19034 |
| rs4735240 | Depression | 500199 | T | C | 8 | 0.5648 | 0.0201 | 0.0044 | 94845671 | 4.02E-06 | 20.86829 |
| rs4350019 | Depression | 500199 | G | A | 8 | 0.8436 | 0.0286 | 0.0059 | 65564428 | 1.32E-06 | 23.49785 |
| rs1016165 | Depression | 500199 | C | T | 8 | 0.4356 | -0.0221 | 0.0044 | 31824555 | 4.18E-07 | 25.22779 |
| rs11250015 | Depression | 500199 | G | A | 8 | 0.8107 | -0.0291 | 0.0055 | 10307328 | 1.17E-07 | 27.99372 |
| rs71524105 | Depression | 500199 | A | G | 8 | 0.1032 | 0.0332 | 0.0071 | 13872126 | 2.93E-06 | 21.8655 |
| rs67436663 | Depression | 500199 | C | G | 8 | 0.2378 | -0.0258 | 0.0052 | 71347626 | 5.32E-07 | 24.61686 |
| rs7842361 | Depression | 500199 | T | C | 8 | 0.1372 | -0.0325 | 0.0063 | 1.19E+08 | 2.44E-07 | 26.6125 |
| rs6479487 | Depression | 500199 | G | T | 9 | 0.1564 | 0.0296 | 0.0059 | 96237373 | 5.56E-07 | 25.16978 |
| rs12335840 | Depression | 500199 | T | C | 9 | 0.1842 | 0.0267 | 0.0056 | 1.27E+08 | 1.60E-06 | 22.73246 |
| rs62535714 | Depression | 500199 | A | G | 9 | 0.1639 | 0.0339 | 0.0058 | 37182655 | 4.69E-09 | 34.16201 |
| rs3793577 | Depression | 500199 | G | A | 9 | 0.5352 | 0.0234 | 0.0043 | 23737627 | 6.79E-08 | 29.61385 |
| rs1359815 | Depression | 500199 | T | C | 9 | 0.2721 | 0.0221 | 0.0048 | 25458799 | 4.87E-06 | 21.19835 |
| rs59283172 | Depression | 500199 | A | G | 9 | 0.1081 | -0.039 | 0.007 | 25232978 | 2.41E-08 | 31.04082 |
| rs10961649 | Depression | 500199 | T | C | 9 | 0.3209 | 0.023 | 0.0046 | 14670949 | 6.31E-07 | 25 |
| rs7046881 | Depression | 500199 | G | T | 9 | 0.4218 | -0.021 | 0.0044 | 82515992 | 1.62E-06 | 22.77893 |
| rs2418449 | Depression | 500199 | C | T | 9 | 0.281 | -0.0281 | 0.0048 | 1.2E+08 | 4.25E-09 | 34.27127 |
| rs1931388 | Depression | 500199 | G | A | 9 | 0.4042 | -0.0295 | 0.0044 | 11203149 | 1.68E-11 | 44.95093 |
| rs1021363 | Depression | 500199 | G | A | 10 | 0.6434 | -0.03 | 0.0045 | 1.07E+08 | 2.29E-11 | 44.44444 |
| rs7097344 | Depression | 500199 | T | C | 10 | 0.0214 | 0.0734 | 0.0149 | 1.15E+08 | 8.64E-07 | 24.2672 |
| rs6602459 | Depression | 500199 | C | G | 10 | 0.7395 | -0.0236 | 0.0051 | 10910560 | 3.74E-06 | 21.4133 |
| rs7098208 | Depression | 500199 | T | C | 10 | 0.2482 | 0.0239 | 0.0052 | 18553164 | 3.77E-06 | 21.12463 |
| rs79780963 | Depression | 500199 | T | C | 10 | 0.0803 | -0.0368 | 0.0079 | 1.05E+08 | 3.40E-06 | 21.69909 |
| rs10821866 | Depression | 500199 | A | C | 10 | 0.5149 | -0.0215 | 0.0043 | 62751135 | 6.15E-07 | 25 |
| rs4746612 | Depression | 500199 | C | T | 10 | 0.5861 | -0.0227 | 0.0044 | 68404939 | 2.17E-07 | 26.61622 |
| rs11220798 | Depression | 500199 | T | C | 11 | 0.0718 | 0.0401 | 0.0083 | 1.27E+08 | 1.40E-06 | 23.3417 |
| rs2509805 | Depression | 500199 | C | T | 11 | 0.6759 | -0.0239 | 0.0046 | 57650796 | 2.40E-07 | 26.9948 |
| rs10838721 | Depression | 500199 | G | A | 11 | 0.0242 | 0.0654 | 0.0139 | 47509017 | 2.51E-06 | 22.13736 |
| rs198457 | Depression | 500199 | T | C | 11 | 0.1886 | -0.0315 | 0.0056 | 61471678 | 1.90E-08 | 31.64063 |
| rs578174 | Depression | 500199 | G | A | 11 | 0.1052 | -0.0364 | 0.0072 | 89959637 | 3.60E-07 | 25.55864 |
| rs4936276 | Depression | 500199 | C | G | 11 | 0.622 | 0.0278 | 0.0044 | 1.13E+08 | 3.57E-10 | 39.91942 |
| rs6589675 | Depression | 500199 | G | C | 11 | 0.8888 | -0.0349 | 0.0069 | 1.19E+08 | 4.70E-07 | 25.58307 |
| rs10835380 | Depression | 500199 | G | A | 11 | 0.3613 | -0.0244 | 0.0046 | 28644729 | 9.63E-08 | 28.13611 |
| rs4497414 | Depression | 500199 | C | T | 11 | 0.44 | 0.0291 | 0.0044 | 88756779 | 2.93E-11 | 43.74019 |
| rs10896012 | Depression | 500199 | C | T | 11 | 0.213 | 0.027 | 0.0053 | 65278461 | 3.48E-07 | 25.9523 |
| rs61914045 | Depression | 500199 | A | G | 12 | 0.2034 | 0.0309 | 0.0054 | 52352301 | 7.96E-09 | 32.74383 |
| rs55874815 | Depression | 500199 | C | A | 12 | 0.0482 | -0.0475 | 0.0101 | 1.21E+08 | 2.49E-06 | 22.11793 |
| rs2292996 | Depression | 500199 | C | T | 12 | 0.4775 | 0.0204 | 0.0043 | 1.04E+08 | 2.65E-06 | 22.5073 |
| rs261909 | Depression | 500199 | C | G | 12 | 0.4409 | 0.0212 | 0.0043 | 22874365 | 9.19E-07 | 24.30719 |
| rs6606679 | Depression | 500199 | C | T | 12 | 0.6608 | 0.024 | 0.0046 | 1.1E+08 | 1.53E-07 | 27.22117 |
| rs56080343 | Depression | 500199 | C | T | 12 | 0.1795 | 0.0268 | 0.0056 | 1.19E+08 | 1.70E-06 | 22.90306 |
| rs1908953 | Depression | 500199 | G | T | 12 | 0.553 | 0.0222 | 0.0044 | 84081344 | 3.69E-07 | 25.45661 |
| rs9529218 | Depression | 500199 | T | C | 13 | 0.2031 | -0.034 | 0.0054 | 31790053 | 2.23E-10 | 39.64335 |
| rs1414622 | Depression | 500199 | C | T | 13 | 0.0778 | -0.0408 | 0.008 | 97208898 | 3.95E-07 | 26.01 |
| rs9538160 | Depression | 500199 | A | G | 13 | 0.3673 | -0.0225 | 0.0045 | 59254159 | 5.17E-07 | 25 |
| rs508502 | Depression | 500199 | T | C | 13 | 0.2992 | -0.0264 | 0.0048 | 80921519 | 3.56E-08 | 30.25 |
| rs3783007 | Depression | 500199 | G | T | 13 | 0.3807 | 0.0213 | 0.0044 | 99109816 | 1.47E-06 | 23.4344 |
| rs9536381 | Depression | 500199 | T | C | 13 | 0.3259 | 0.0255 | 0.0046 | 53860655 | 2.62E-08 | 30.73015 |
| rs36168783 | Depression | 500199 | T | C | 13 | 0.6096 | -0.0204 | 0.0044 | 75272579 | 3.72E-06 | 21.49587 |
| rs76134318 | Depression | 500199 | T | G | 14 | 0.0516 | 0.0476 | 0.0098 | 62518436 | 1.10E-06 | 23.59184 |
| rs12589834 | Depression | 500199 | G | A | 14 | 0.2557 | -0.027 | 0.0051 | 64771405 | 1.31E-07 | 28.02768 |
| rs754287 | Depression | 500199 | A | T | 14 | 0.3664 | -0.0289 | 0.0045 | 1.04E+08 | 1.31E-10 | 41.24494 |
| rs1955596 | Depression | 500199 | C | T | 14 | 0.0725 | 0.0398 | 0.0084 | 88820021 | 2.17E-06 | 22.44955 |
| rs7152906 | Depression | 500199 | C | T | 14 | 0.5196 | 0.0258 | 0.0043 | 75125540 | 1.87E-09 | 36 |
| rs56101042 | Depression | 500199 | G | A | 14 | 0.1835 | 0.0278 | 0.0055 | 1.03E+08 | 5.06E-07 | 25.54843 |
| rs1950829 | Depression | 500199 | G | A | 14 | 0.5173 | -0.0297 | 0.0043 | 42097937 | 4.74E-12 | 47.70633 |
| rs34488670 | Depression | 500199 | C | T | 15 | 0.2115 | 0.027 | 0.0053 | 47684936 | 2.63E-07 | 25.9523 |
| rs4776768 | Depression | 500199 | C | T | 15 | 0.717 | 0.0252 | 0.0048 | 66529936 | 1.43E-07 | 27.5625 |
| rs4404022 | Depression | 500199 | T | A | 15 | 0.4116 | 0.0204 | 0.0044 | 74010430 | 3.65E-06 | 21.49587 |
| rs1530310 | Depression | 500199 | G | A | 15 | 0.3007 | -0.0221 | 0.0047 | 88822927 | 2.47E-06 | 22.11 |
| rs779 | Depression | 500199 | A | G | 15 | 0.8831 | -0.0311 | 0.0068 | 29856238 | 4.49E-06 | 20.91717 |
| rs28541419 | Depression | 500199 | G | C | 15 | 0.2308 | -0.0292 | 0.0052 | 88945878 | 1.76E-08 | 31.53254 |
| rs9920233 | Depression | 500199 | A | C | 15 | 0.4686 | -0.0202 | 0.0043 | 37656571 | 2.59E-06 | 22.06814 |
| rs66651392 | Depression | 500199 | T | C | 16 | 0.2526 | 0.0229 | 0.005 | 15611592 | 3.81E-06 | 20.9764 |
| rs12919291 | Depression | 500199 | C | G | 16 | 0.1884 | 0.0327 | 0.0055 | 13800430 | 3.09E-09 | 35.34843 |
| rs8050761 | Depression | 500199 | G | C | 16 | 0.3755 | -0.0222 | 0.0045 | 7459039 | 6.73E-07 | 24.33778 |
| rs1862743 | Depression | 500199 | A | C | 16 | 0.4941 | -0.0214 | 0.0043 | 60743834 | 6.86E-07 | 24.76798 |
| rs111605708 | Depression | 500199 | T | A | 16 | 0.0411 | -0.0524 | 0.0113 | 21650045 | 3.61E-06 | 21.50333 |
| rs7499405 | Depression | 500199 | A | G | 16 | 0.561 | -0.0202 | 0.0044 | 49828994 | 3.56E-06 | 21.07645 |
| rs7200826 | Depression | 500199 | T | C | 16 | 0.2568 | 0.0268 | 0.0049 | 13066833 | 5.49E-08 | 29.9142 |
| rs77579223 | Depression | 500199 | T | C | 17 | 0.2536 | -0.0251 | 0.005 | 66406803 | 4.86E-07 | 25.2004 |
| rs11078936 | Depression | 500199 | C | T | 17 | 0.3716 | -0.0211 | 0.0045 | 38197914 | 2.36E-06 | 21.98568 |
| rs7241572 | Depression | 500199 | A | G | 18 | 0.2047 | 0.0323 | 0.0054 | 77580712 | 2.43E-09 | 35.77812 |
| rs547488 | Depression | 500199 | C | G | 18 | 0.447 | 0.0202 | 0.0043 | 26481463 | 3.12E-06 | 22.06814 |
| rs11662323 | Depression | 500199 | T | C | 18 | 0.2109 | -0.0245 | 0.0053 | 36943321 | 3.34E-06 | 21.36881 |
| rs884285 | Depression | 500199 | T | C | 18 | 0.3341 | 0.0239 | 0.0046 | 52733905 | 1.57E-07 | 26.9948 |
| rs4799949 | Depression | 500199 | T | C | 18 | 0.6684 | -0.0292 | 0.0046 | 35155910 | 1.40E-10 | 40.2949 |
| rs187843156 | Depression | 500199 | T | C | 18 | 0.1351 | 0.03 | 0.0064 | 53763259 | 2.44E-06 | 21.97266 |
| rs1367635 | Depression | 500199 | C | T | 18 | 0.5148 | 0.0253 | 0.0043 | 50861409 | 4.35E-09 | 34.61817 |
| rs12967143 | Depression | 500199 | C | G | 18 | 0.7012 | -0.0345 | 0.0047 | 53099012 | 2.53E-13 | 53.88185 |
| rs10415547 | Depression | 500199 | C | T | 19 | 0.747 | 0.0231 | 0.005 | 59006510 | 3.96E-06 | 21.3444 |
| rs12979771 | Depression | 500199 | T | C | 19 | 0.314 | 0.0219 | 0.0047 | 4963443 | 3.21E-06 | 21.71163 |
| rs1477272 | Depression | 500199 | C | T | 19 | 0.46 | -0.0203 | 0.0044 | 18431627 | 3.87E-06 | 21.28564 |
| rs34947393 | Depression | 500199 | C | G | 19 | 0.0296 | -0.0605 | 0.013 | 39891220 | 3.18E-06 | 21.65828 |
| rs13037326 | Depression | 500199 | T | C | 20 | 0.2597 | 0.031 | 0.0049 | 44692598 | 2.40E-10 | 40.02499 |
| rs4818766 | Depression | 500199 | G | A | 21 | 0.5658 | 0.0224 | 0.0045 | 46635351 | 6.38E-07 | 24.77827 |
| rs12160976 | Depression | 500199 | A | G | 22 | 0.3399 | -0.0243 | 0.0047 | 46438246 | 2.40E-07 | 26.7311 |
| rs5771864 | Depression | 500199 | C | T | 22 | 0.5695 | -0.0202 | 0.0044 | 49205655 | 4.61E-06 | 21.07645 |
| rs12627769 | Depression | 500199 | A | G | 22 | 0.1914 | -0.0258 | 0.0055 | 20031102 | 2.82E-06 | 22.00463 |
| rs10204333 | ovarian cysts | 79,817 | C | T | 2 | 0.5086 | 0.0771 | 0.0153 | 2.09E+08 | 4.48E-07 | 25.39369 |
| rs116176837 | ovarian cysts | 79,817 | A | C | 2 | 0.02747 | 0.2465 | 0.047 | 2.17E+08 | 1.55E-07 | 27.50668 |
| rs35920363 | ovarian cysts | 79,817 | C | T | 2 | 0.2754 | -0.0834 | 0.0172 | 1.14E+08 | 1.23E-06 | 23.51122 |
| rs1430787 | ovarian cysts | 79,817 | T | A | 2 | 0.691 | -0.0789 | 0.0165 | 67868498 | 1.73E-06 | 22.86579 |
| rs147291162 | ovarian cysts | 79,817 | A | G | 3 | 0.01886 | -0.2795 | 0.059 | 1.11E+08 | 2.12E-06 | 22.4419 |
| rs2087849 | ovarian cysts | 79,817 | T | A | 4 | 0.7495 | 0.0826 | 0.0176 | 1.43E+08 | 2.70E-06 | 22.02596 |
| rs7734992 | ovarian cysts | 79,817 | C | T | 5 | 0.4642 | 0.0773 | 0.0153 | 1280128 | 4.44E-07 | 25.52561 |
| rs1307274 | ovarian cysts | 79,817 | G | T | 6 | 0.9496 | -0.1656 | 0.0352 | 34240576 | 2.46E-06 | 22.13275 |
| rs117849217 | ovarian cysts | 79,817 | G | T | 7 | 0.01765 | -0.2718 | 0.0586 | 1.48E+08 | 3.52E-06 | 21.51313 |
| rs113524473 | ovarian cysts | 79,817 | G | A | 10 | 0.04722 | 0.1781 | 0.036 | 1.06E+08 | 7.32E-07 | 24.47501 |
| rs72638188 | ovarian cysts | 79,817 | T | C | 11 | 0.282 | -0.0824 | 0.017 | 32328646 | 1.22E-06 | 23.49398 |
| rs1853279 | ovarian cysts | 79,817 | C | T | 11 | 0.2264 | -0.0899 | 0.0184 | 29779139 | 9.96E-07 | 23.87172 |
| rs11031005 | ovarian cysts | 79,817 | C | T | 11 | 0.1681 | -0.1544 | 0.0205 | 30226356 | 5.41E-14 | 56.72662 |
| rs4803217 | ovarian cysts | 79,817 | A | C | 19 | 0.2612 | -0.0838 | 0.0174 | 39734220 | 1.47E-06 | 23.19474 |
| rs62235753 | ovarian cysts | 79,817 | T | C | 22 | 0.01172 | 0.3404 | 0.0715 | 29272637 | 1.95E-06 | 22.66559 |
| rs79378907 | ovarian cysts | 79,817 | T | C | 22 | 0.06524 | 0.1609 | 0.0311 | 29346667 | 2.27E-07 | 26.76648 |
| rs149936177 | ovarian cysts | 79,817 | T | C | 22 | 0.009395 | -0.3897 | 0.0824 | 18577220 | 2.25E-06 | 22.36693 |

**Figure S1 The leave-one-out Plots**


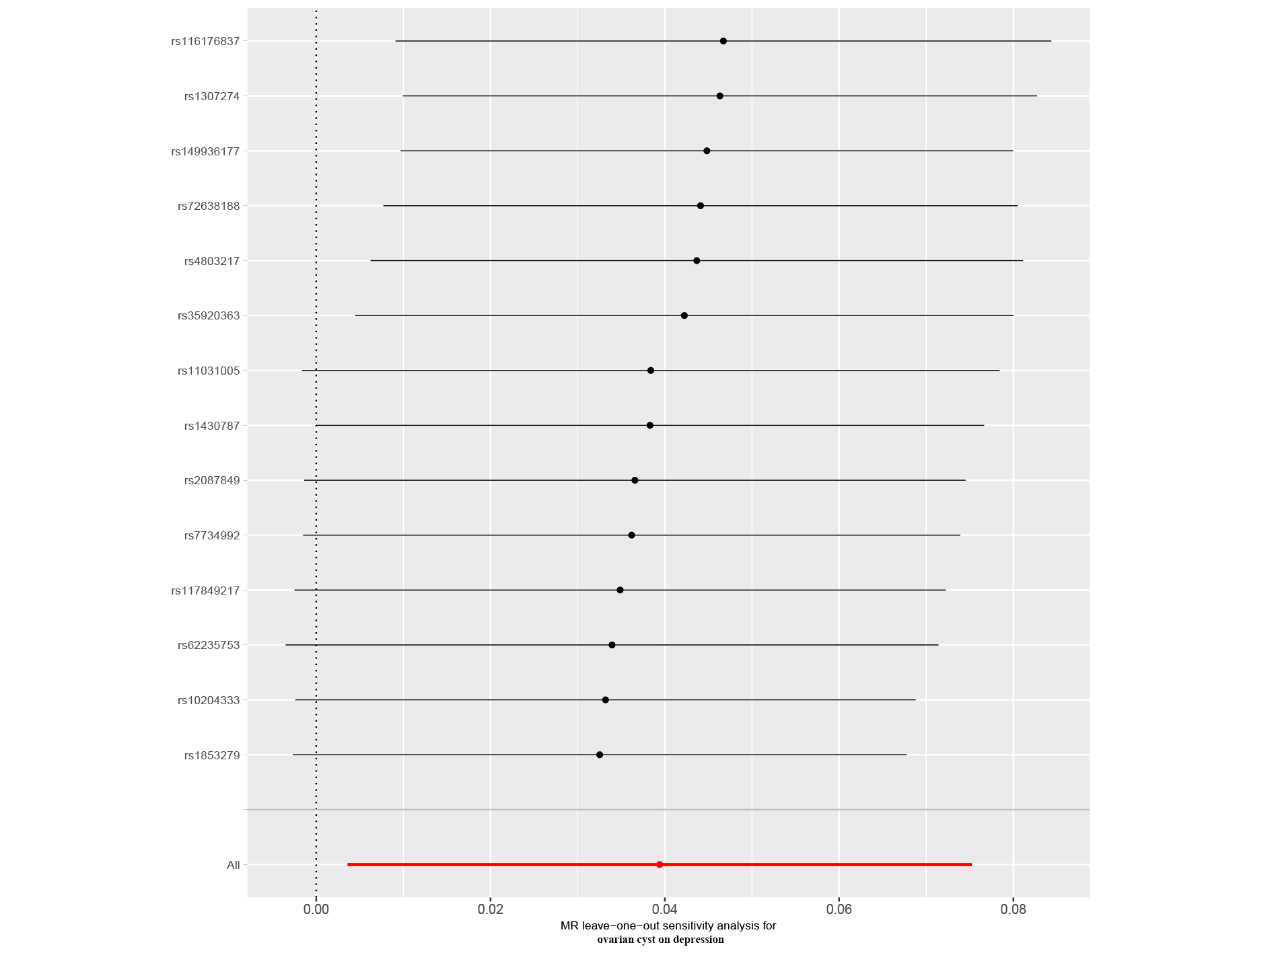

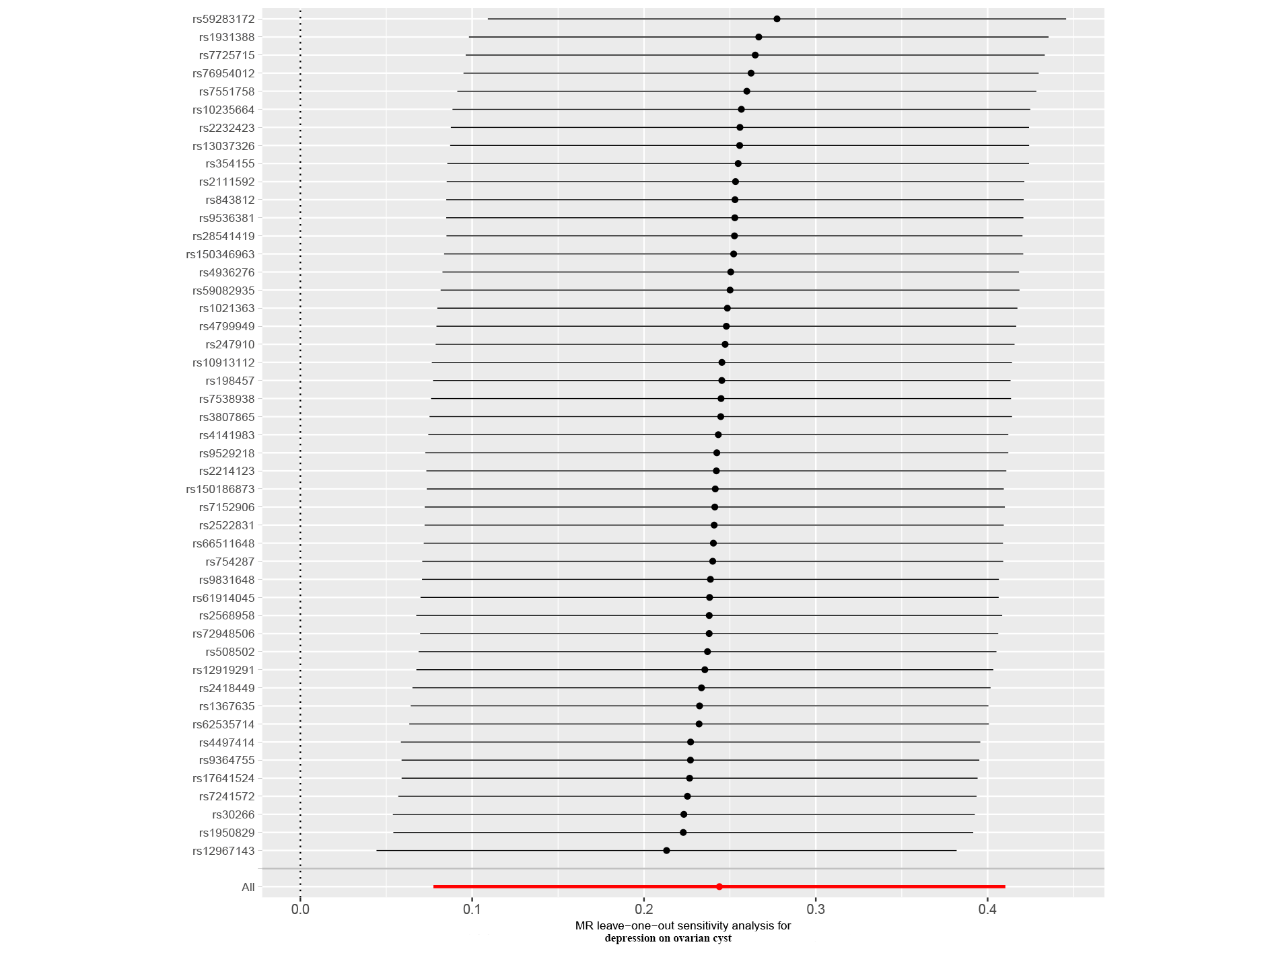


**Figure S2 Funnel Plots**

Depression vs. Ovarian cyst


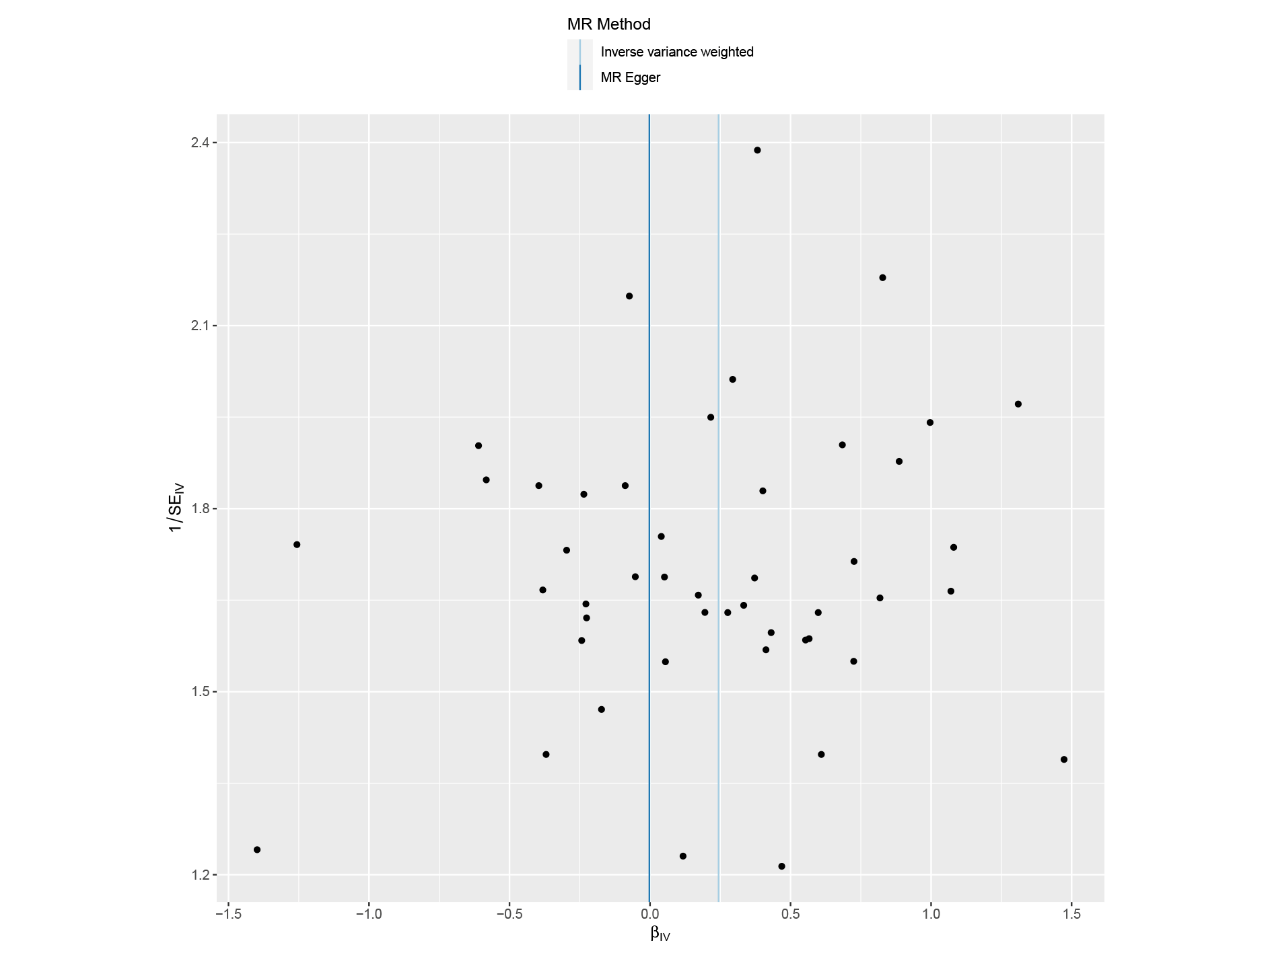


Ovarian cyst vs. Depression


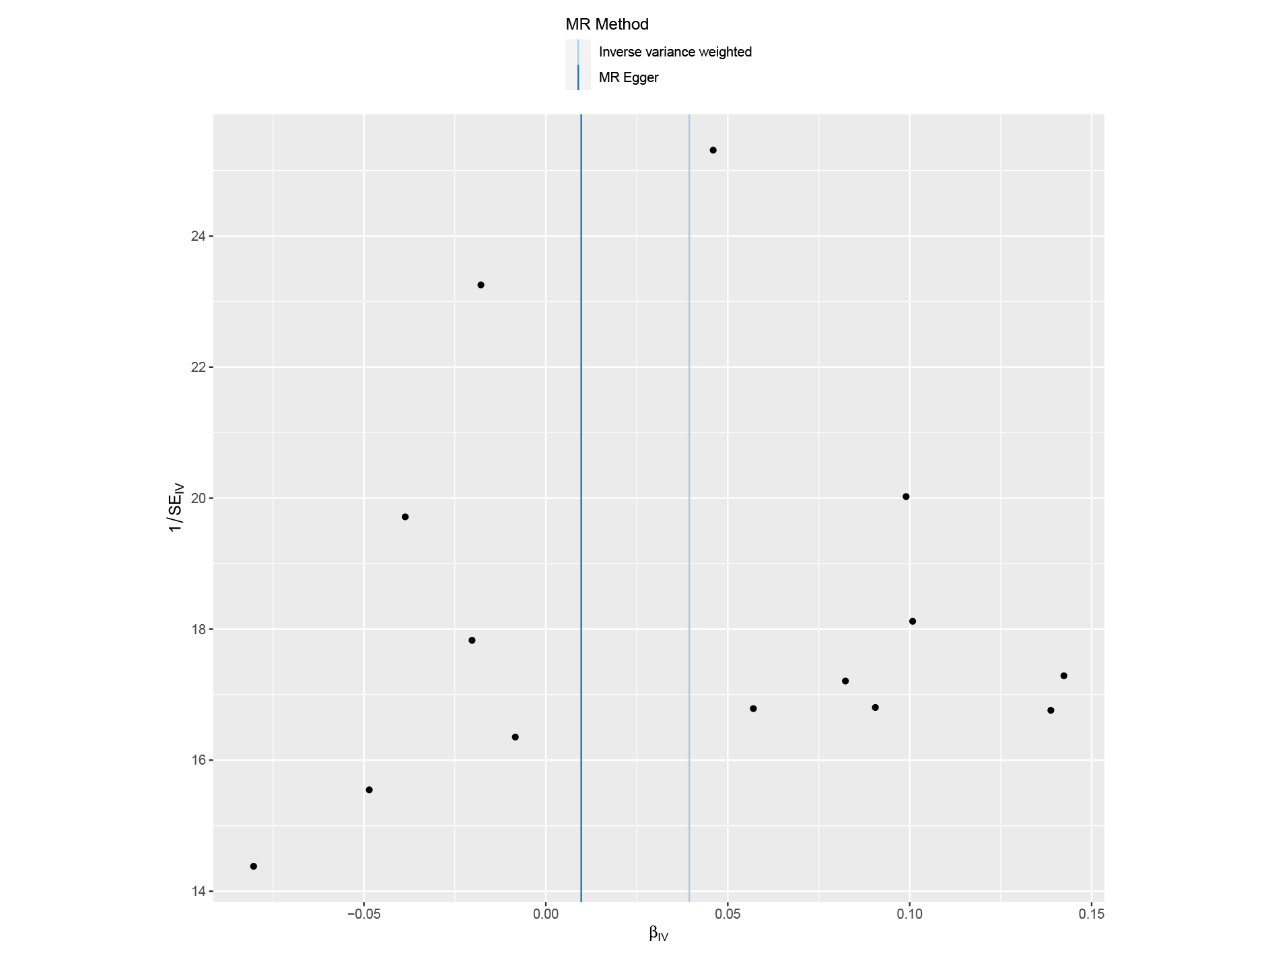


| **Table S2 Pleiotropy analysis** | | | | |
| --- | --- | --- | --- | --- |
|  | | Egger_intercept | se | P |
| Depression-Ovarian cyst | | 0.007 | 0.015 | 0.621 |
| Ovarian cyst-Depression | | 0.003 | 0.004 | 0.457 |
|  |  | |  |  |
|  |  | |  |  |
| **Table S3 Heterogeneity analysis** | | | | |
|  | Method | | Q | p |
| Depression-Ovarian cyst | MR Egger | | 45.148 | 0.465 |
|  | IVW | | 45.396 | 0.497 |
| Ovarian cyst-Depression | MR Egger | | 19.751 | 0.071 |
|  | IVW | | 20.723 | 0.078 |
|  |  | |  |  |
|  |  | |  |  |
| **Table S4 MR-PRESSO analysis** | | | | |
|  | Global Test | | P |  |
| Depression-Ovarian cyst | 48.727 | | 0.552 |  |
| Ovarian cyst-Depression | 23.814 | | 0.102 |  |
|  |  | |  |  |
